# Supplementary material
Source: publisher figshare collection journal article supplement (https://tandf.figshare.com/ndownloader/files/16218461)
Supplement: Supplementary file 1 [file 16218461]

# Dry matter partitioning and K distribution of vegetable soybean genotypes with higher potassium efficiency - Supplement

**Table S1.** Some basic data of forty vegetable soybean genotypes.

| Number | Name    | Seedcoat color | Seed size  | Flower color | Leaf shape |
|--------|---------|----------------|------------|--------------|------------|
| 1      | H44     | Yellow         | Medium     | White        | Round      |
| 2      | Z-13-6  | Green          | Large      | White        | Round      |
| 3      | LC3     | Green          | Medium     | White        | Round      |
| 4      | D4-11   | Yellow         | Large      | Purple       | Ellipse    |
| 5      | BJY     | Black          | Medium     | White        | Ellipse    |
| 6      | ZHY     | Black          | Medium     | Purple       | Ellipse    |
| 7      | DZ1     | Yellow         | Large      | Purple       | Round      |
| 8      | ZKMD2   | Brown          | Large      | White        | Round      |
| 9      | BA123   | Yellow         | Medium     | Purple       | Round      |
| 10     | MD1-70  | Green          | Large      | White        | Round      |
| 11     | ZKMD1   | Yellow         | Very large | White        | Round      |
| 12     | DS9     | Yellow         | Medium     | White        | Ovoid      |
| 13     | FS4     | Brown          | Large      | White        | Round      |
| 14     | N95     | Brown          | Medium     | Purple       | Round      |
| 15     | L27     | Green          | Medium     | White        | Round      |
| 16     | M6Z     | Yellow         | Medium     | Purple       | Round      |
| 17     | FS9CK   | Black          | Medium     | Purple       | Round      |
| 18     | H56     | Yellow         | Large      | White        | Round      |
| 19     | T117    | Yellow         | Large      | White        | Round      |
| 20     | L113    | Yellow         | Large      | White        | Round      |
| 21     | DZ107   | Green          | Large      | Purple       | Round      |
| 22     | ZKMD1-1 | Green          | Large      | White        | Round      |
| 23     | 51-54   | Yellow         | Large      | White        | Round      |
| 24     | RBQ     | Green          | Very large | White        | Round      |
| 25     | FS5     | Yellow         | Very large | White        | Round      |
| 26     | 263-266 | Yellow         | Medium     | White        | Round      |
| 27     | DS28    | Yellow         | Medium     | White        | Ovoid      |
| 28     | Q36     | Green          | Very large | White        | Round      |
| 29     | FS1     | Green          | Medium     | Purple       | Ovoid      |
| 30     | SN26    | Yellow         | Medium     | Purple       | Ovoid      |
| 31     | DS1     | Yellow         | Medium     | Purple       | Ovoid      |
| 32     | DS7     | Yellow         | Medium     | Purple       | Ovoid      |
| 33     | FS3CK   | Green          | Very large | Purple       | Round      |
| 34     | 87-1    | Yellow         | Medium     | White        | Round      |
| 35     | 9701-2  | Green          | Large      | Purple       | Round      |
| 36     | ZX8     | Green          | Very large | White        | Round      |
| 37     | 104     | Green          | Medium     | Purple       | Ellipse    |
| 38     | VS10    | Green          | Large      | Purple       | Round      |
| 39     | T75-1   | Green          | Large      | White        | Round      |
| 40     | Z10     | Green          | Large      | White        | Ellipse    |

**Table S2.** Correlation analysis between KIUE and some parameters

| Variables        | 2016 field experiment |          | 2017 pot experiment |          |
|------------------|-----------------------|----------|---------------------|----------|
|                  | KIUE-Y                | KIUE-B   | KIUE-Y              | KIUE-B   |
| Shoot DW         | 0.144                 | -0.564   | -0.794*             | 0.811*   |
| Grain yield      | 0.532                 | -0.491   | -0.514              | 0.190    |
| K conc. of shoot | -0.43                 | -0.975** | 0.382               | -0.998** |
| K conc. of seed  | 0.068                 | 0.426    | -0.579              | -0.313   |
| K acc. of shoot  | -0.154                | -0.832*  | -0.882**            | 0.372    |
| K acc. of seed   | 0.609                 | -0.438   | -0.845**            | 0.055    |
| HI               | 0.738*                | -0.36    | 0.731*              | -0.908** |
| KHI              | 0.839**               | 0.546    | 0.763*              | -0.750*  |

\*, significant at  $P=0.05$ ; \*\*, significant at  $P=0.01$ .

Abbreviation: KIUE-Y, K internal use efficiency in yield; KIUE-B, K internal use efficiency in biomass; DW, dry matter weight; conc., concentration; acc., accumulation; HI, harvest index; KHI, potassium harvest index.

**Table S3.** Harvest index and K harvest index of various K efficiency genotypes under two K levels

|     |      | Harvest index (%) |       | K harvest index (%) |        |
|-----|------|-------------------|-------|---------------------|--------|
|     |      | K0                | K120  | K0                  | K120   |
| KHE | T117 | 44.0a             | 43.7a | 81.1a               | 74.8a  |
|     | L113 | 37.8b             | 35.5b | 79.6a               | 71.6a  |
| KLE | DZ1  | 29.3c             | 29.8c | 64.8c               | 62.5b  |
|     | ZX8  | 31.4c             | 29.6c | 72.2b               | 68.7ab |

Genotypes with different letters are significantly different (ANOVA,  $P \leq 0.05$ ).

Abbreviation: KHE, K high efficiency; KLE, K low efficiency; K0, 0kg ha<sup>-1</sup> K<sub>2</sub>SO<sub>4</sub> treatment; K120, 120kg ha<sup>-1</sup> K<sub>2</sub>SO<sub>4</sub> treatment.
